# Supplementary material for: In situ identification of the adsorption of 4,4′-thiobisbenzenethiol on silver nanoparticles surface: a combined investigation of surface-enhanced Raman scattering and density functional theory study
Source: Royal Society of Chemistry journal article supplement (doi:10.1039/c2cp24147a), 2012-01-01
Supplement: c2cp24147a.pdf [file c2cp24147a.pdf]

Support information:

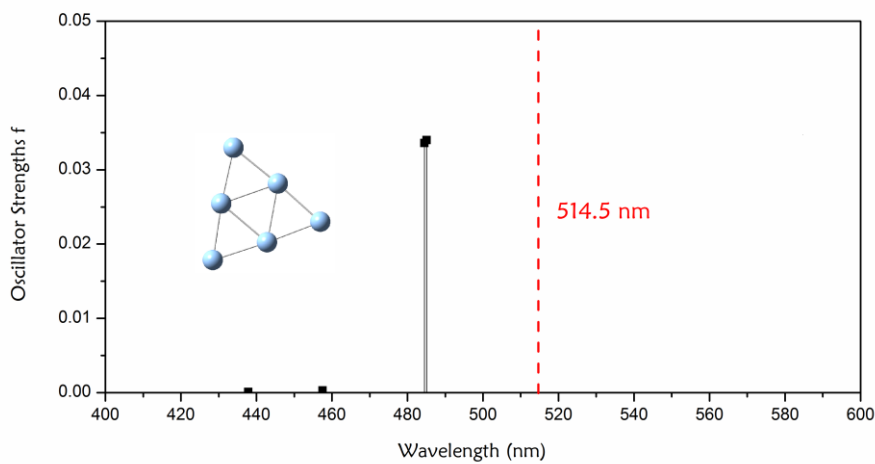

S1. The calculated electronic transition states of  $\text{Ag}_6$  cluster using TD-DFT method.

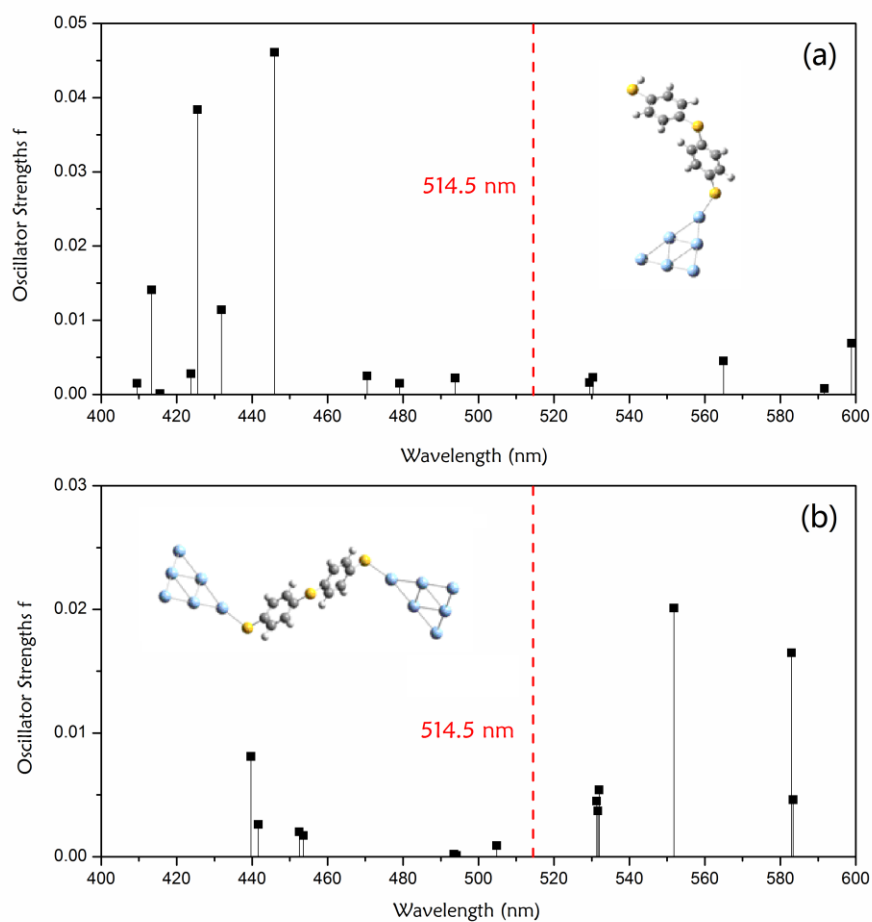

S2. The calculated electronic transition states of TBBT/Ag<sub>6</sub> complex (a) and Ag<sub>6</sub>/TBBT/Ag<sub>6</sub> complex (b) using TD-DFT method.

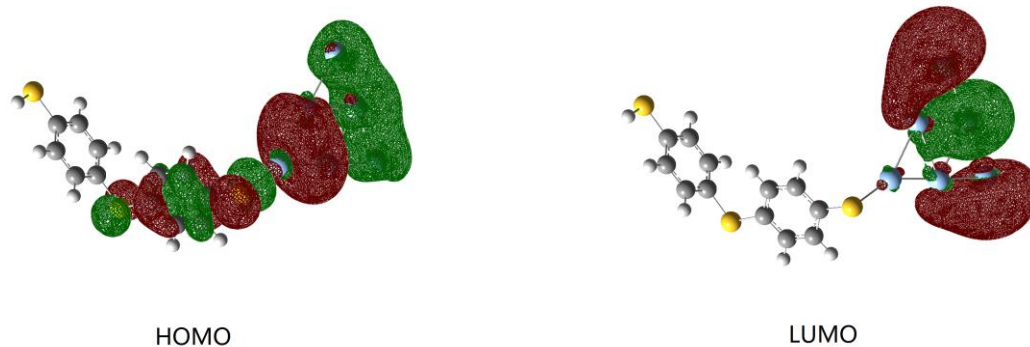

S3. Orbitals involved in the major CT excitation for TBBT/Ag<sub>6</sub> complex at 493.82 nm (HOMO → LUMO,  $f=0.0022$ ) shown with an isosurface value of 0.02 au.

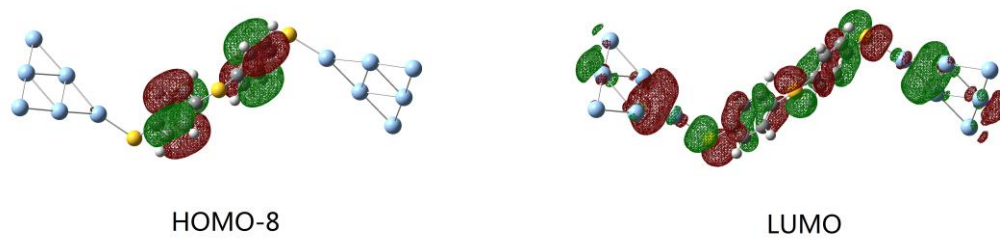

S4.Orbitals involved in the major CT excitation for  $\text{Ag}_6/\text{TBBT}/\text{Ag}_6$  complex at 531.3 nm (HOMO-8 $\rightarrow$ LUMO,  $f=0.0045$ ) shown with an isosurface value of 0.02 au.

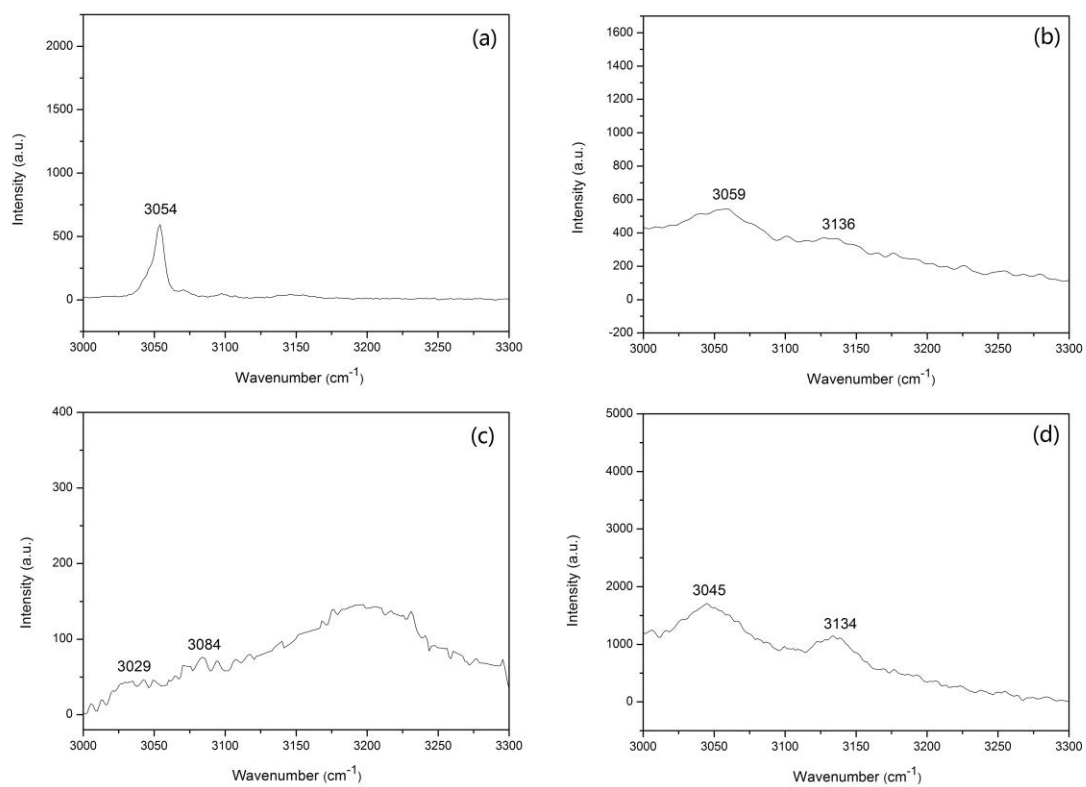

S5. The measured Raman spectrum of bulk TBBT (a), and SERS spectra of sample 1 (b), sample 2(c) and sample 3 (d) in high wavenumber region 3000-3300  $\text{cm}^{-1}$ .

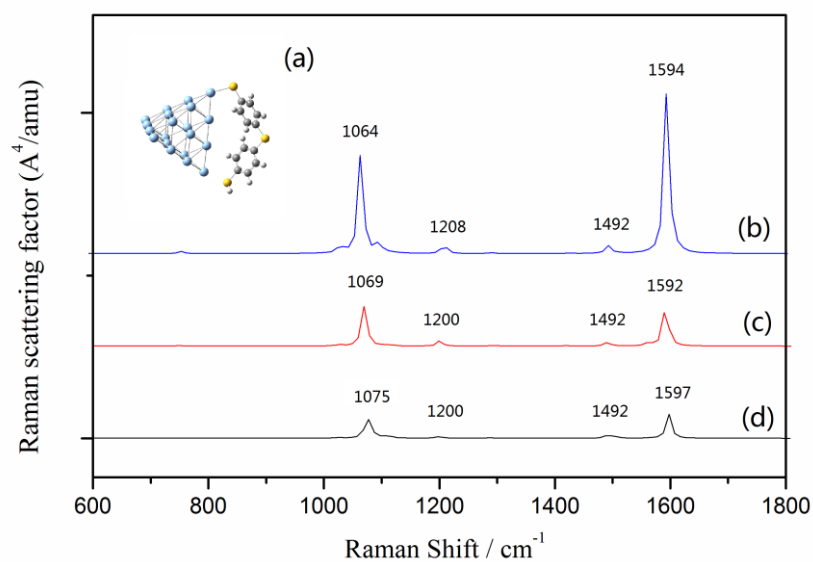

S6. optimistic structures of single-end bridge-like TBBT- $\text{Ag}_{20}$  (vertex-vertex) (a); Simulated Raman spectra of vertex-type single-end TBBT- $\text{Ag}_{20}$  (b); single-end bridge-like TBBT- $\text{Ag}_{20}$  (vertex-vertex) (d); and double-end bridge-like TBBT- $\text{Ag}_{20}$  (vertex-vertex) (c).
